# Supplementary material for: HS-GC-IMS and PCA to Characterize the Volatile Flavor Compounds in Three Sweet Cherry Cultivars and Their Wines in China
Source: MDPI journal article supplement (doi:10.3390/molecules27249056), 2022-12-19
Supplement: s1 [file s1]

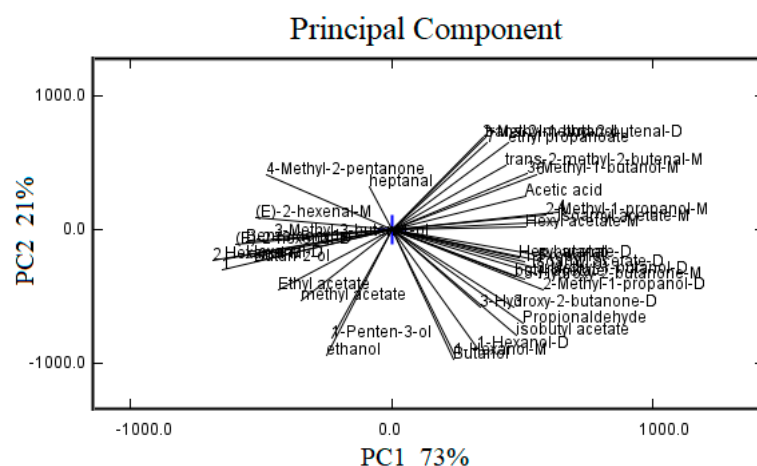

**Supplementary Figure S1.** The loading plot of PCA analysis in cherry fruits from three cultivars.

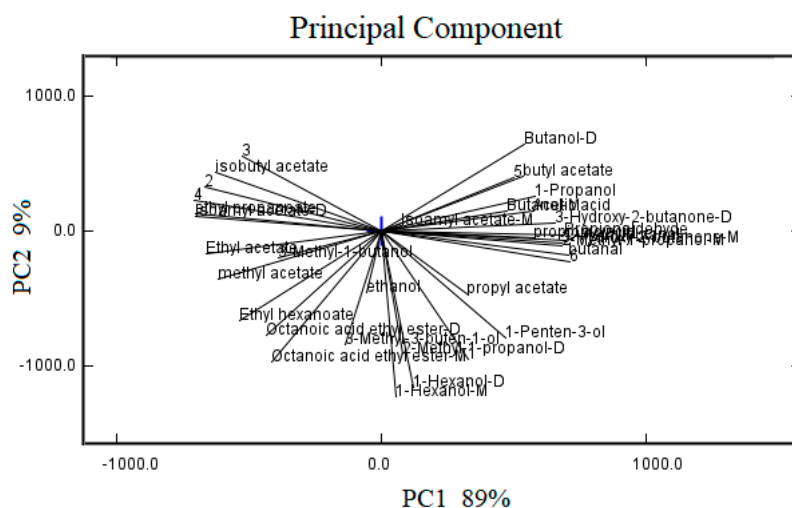

**Supplementary Figure S2.** The loading plot of PCA analysis in cherry wines derived from three cultivars.
